# Supplementary material for: Selenium infiltrated hierarchical hollow carbon spheres display rapid kinetics and extended cycling as lithium metal battery (LMB) cathodes
Source: Royal Society of Chemistry journal article supplement (doi:10.1039/d1ta04705a), 2021-01-01
Supplement: d1ta04705a1.pdf [file d1ta04705a1.pdf]

## Supporting Information

### **Selenium Infiltrated Hierarchical Hollow Carbon Spheres Display Rapid Kinetics and Extended Cycling as Lithium Metal Battery (LMB) Cathodes**

Yixian Wang<sup>\*1</sup>, Hongchang Hao<sup>1</sup>, Sooyeon Hwang<sup>2</sup>, Pengcheng Liu<sup>1</sup>, Yixin Xu<sup>2,3</sup>, J. Anibal Boscoboinik<sup>2</sup>, Dibakar Datta<sup>4</sup>, David Mitlin<sup>\*1</sup>

<sup>1</sup> Materials Science and Engineering Program & Texas Materials Institute (TMI), The University of Texas at Austin, Austin, TX 78712-1591, USA

<sup>2</sup> Center for Functional Nanomaterials, Brookhaven National Laboratory, Upton, NY 11973, USA

<sup>3</sup> Department of Materials Science and Chemical Engineering, State University of New York at Stony Brook, Stony Brook, NY 11794, USA

<sup>4</sup> Department of Mechanical and Industrial Engineering, New Jersey Institute of Technology, Newark, New Jersey 07103, United States

\*Corresponding authors.

Emails: [yixwang@utexas.edu](mailto:yixwang@utexas.edu); [David.Mitlin@austin.utexas.edu](mailto:David.Mitlin@austin.utexas.edu)

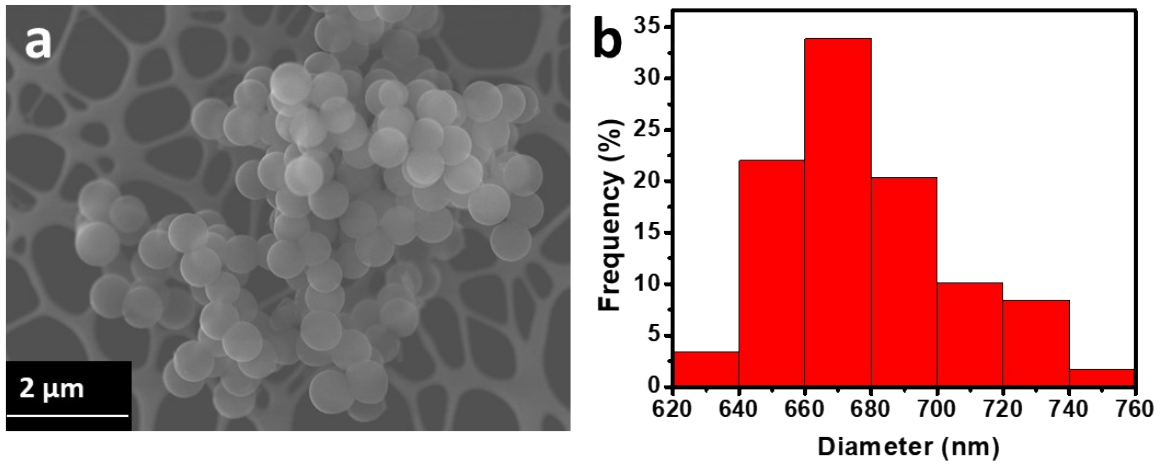

**Figure S1.** (a) SEM image and (b) size distribution of MCS.

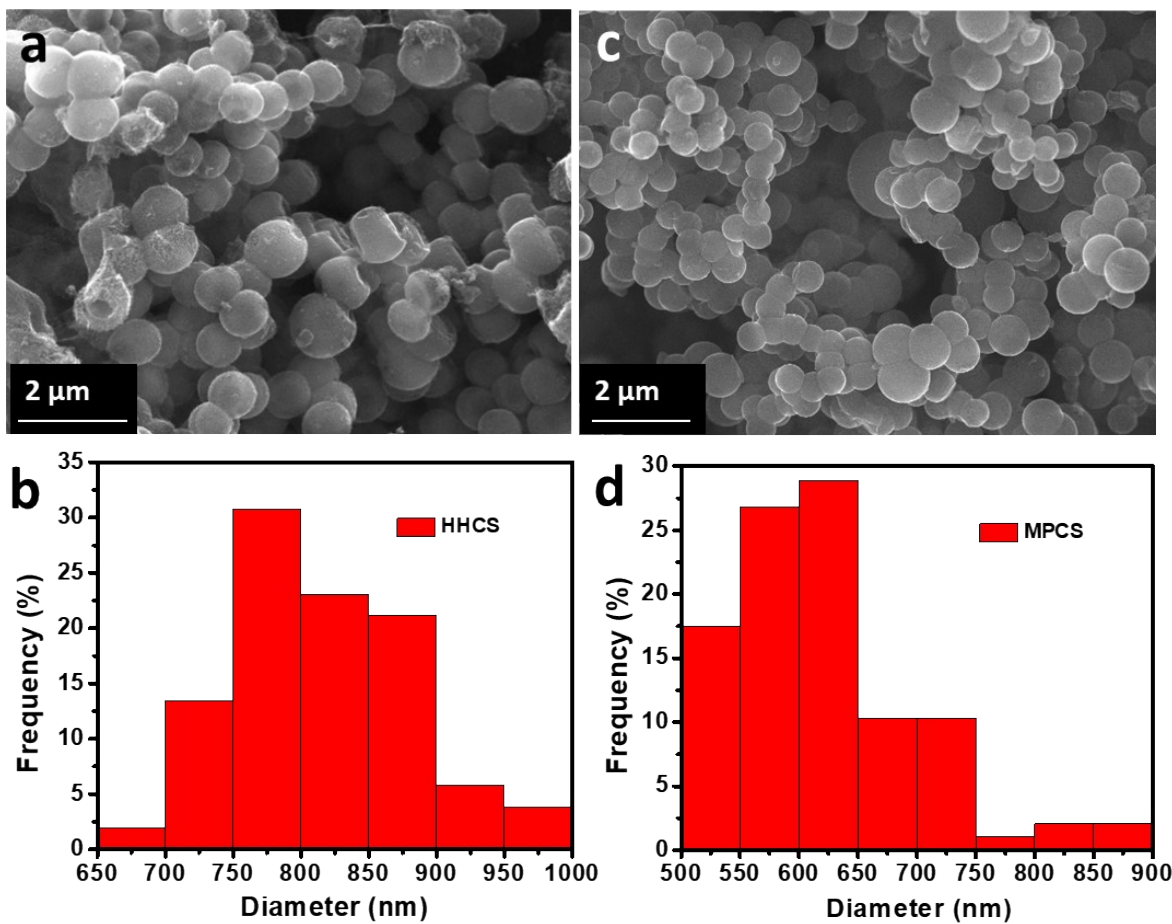

**Figure S2.** SEM images of (a) HHCS and (b) MPCs. Size distribution of (c) HHCS and (d) MPCs.

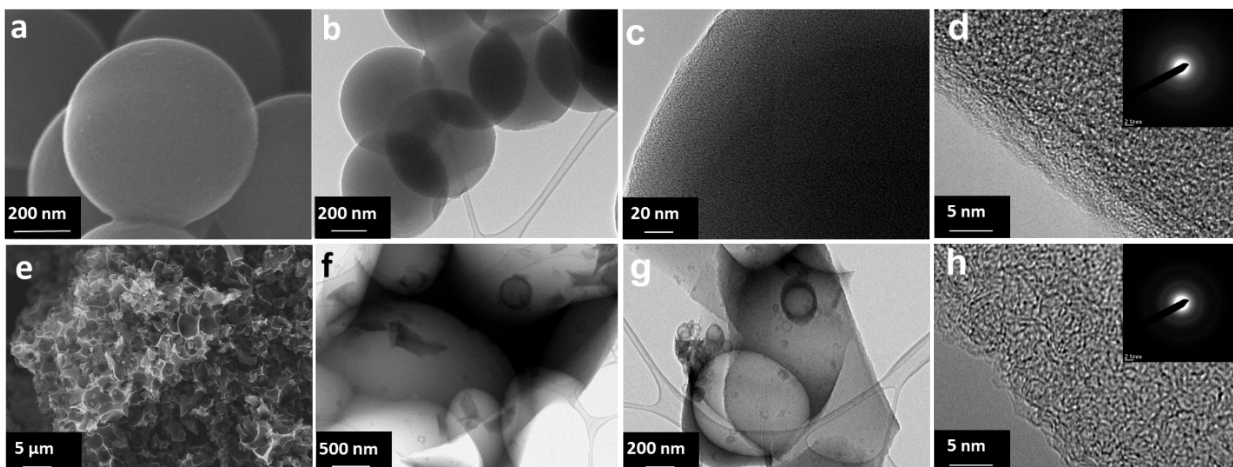

**Figure S3.** SEM images of **(a)** MPCs and **(c)** MPCP. TEM images of **(b, c)** MPCs and **(f, g)** MPCP. HRTEM images with SAED insets of **(d)** MPCs and **(i)** MPCP.

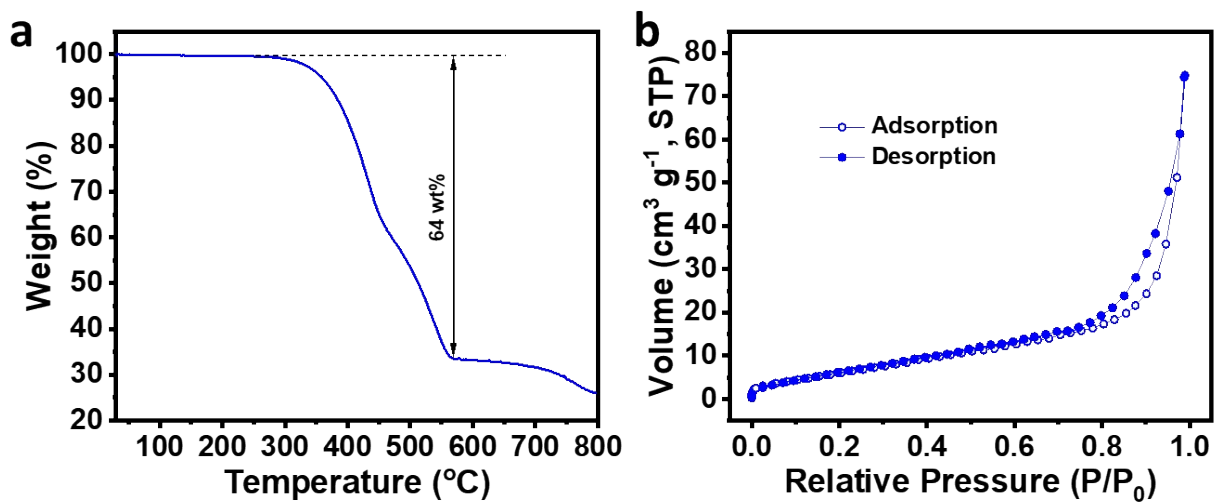

**Figure S4.** (a) TGA curve of Se<sub>HL</sub>@HHCS from room temperature to 800 °C, tested in Ar. (b) Nitrogen adsorption-desorption isotherm of Se<sub>HL</sub>@HHCS

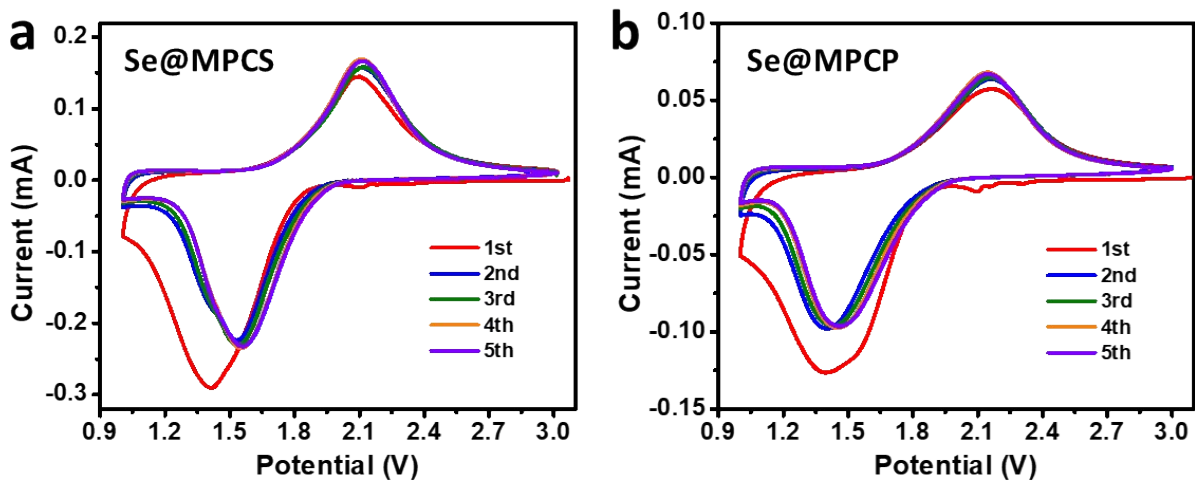

**Figure S5.** CV curves of (a) Se@MPCS and (b) Se@MPCP at a scan rate of 0.1 mV s<sup>-1</sup>

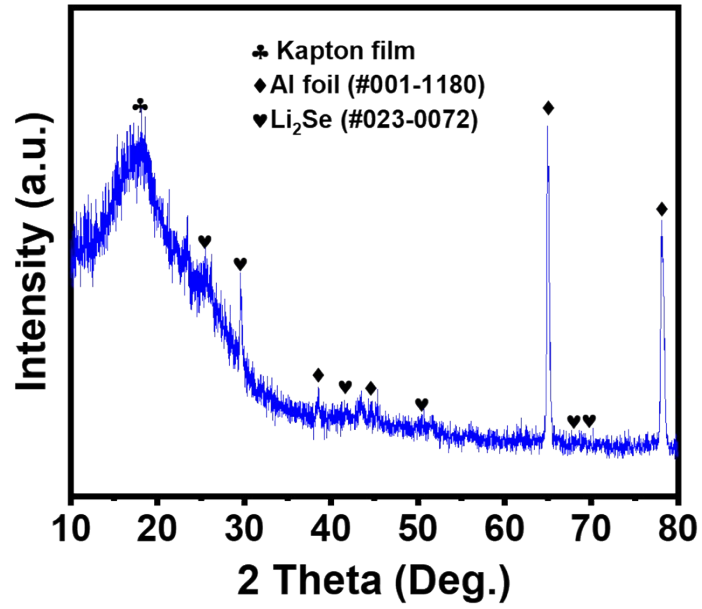

Figure S6. XRD profile of Se@HHCS discharged to 1 V at cycle 1.

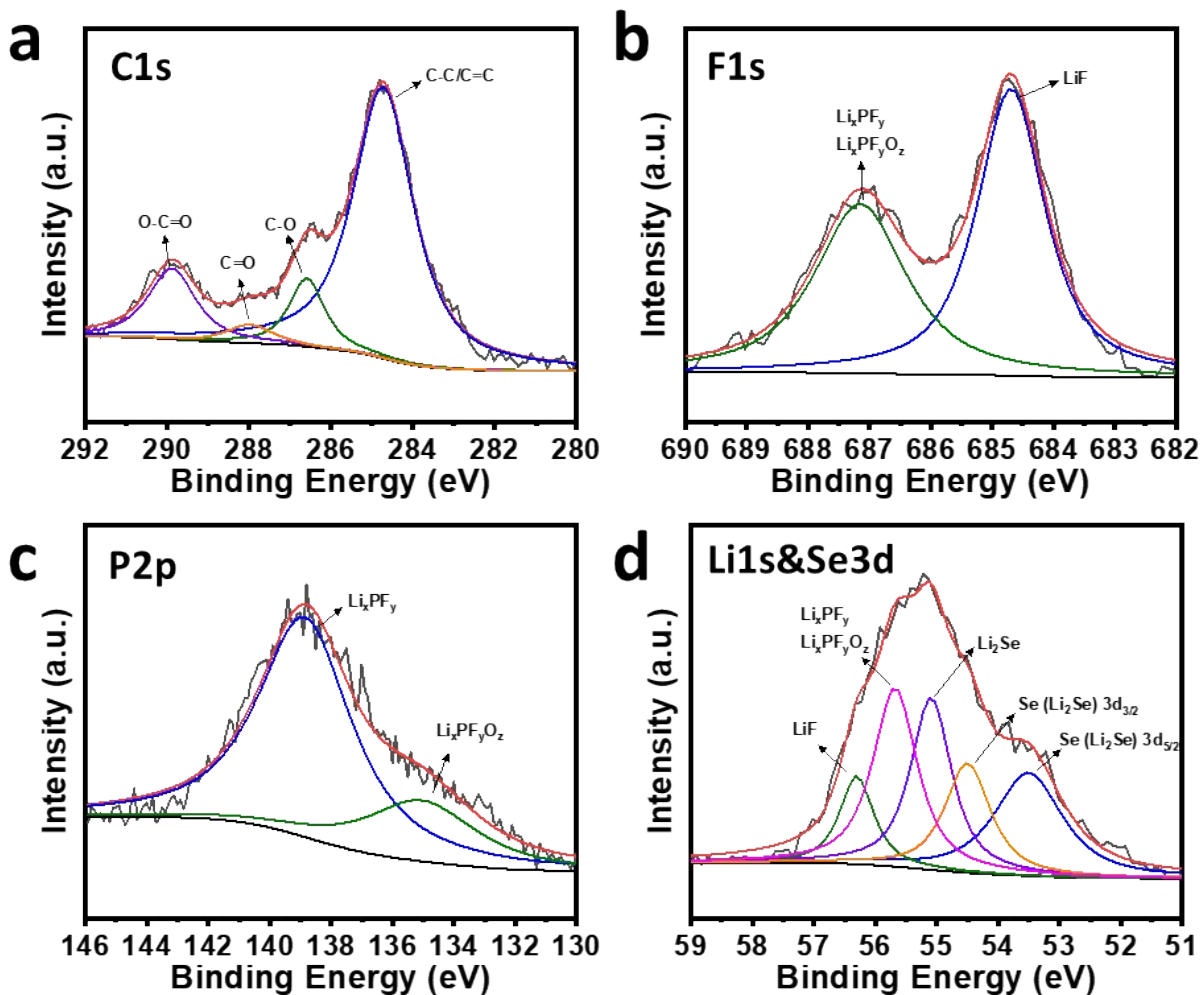

**Figure S7.** High-resolution XPS spectra of (a) C1s, (b) F1s, (c) P2p and (d) Li1s & Se3d of Se@HHCS discharged to 1 V at cycle 1.

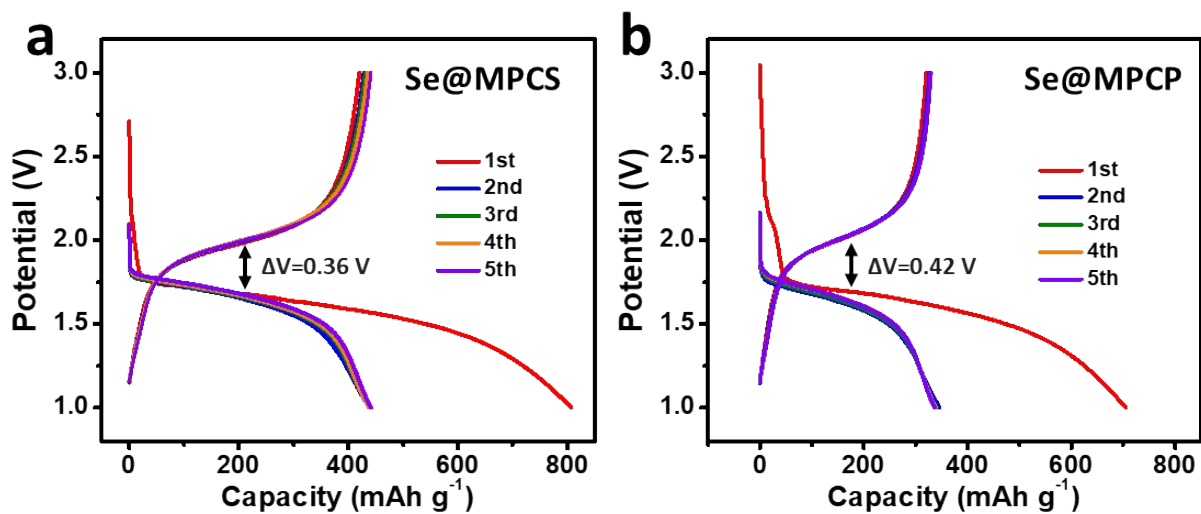

Figure S8. Galvanostatic profiles of (a) Se@MPCS and (b) Se@MPCP at 0.2C.

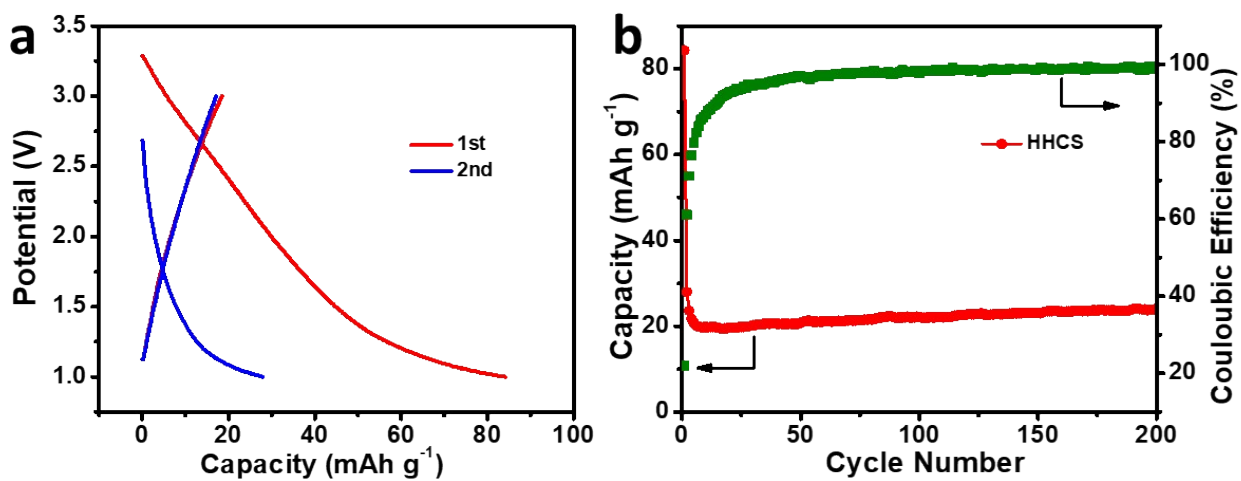

Figure S9. (a) Galvanostatic profiles and (b) cycling performance of HHCS at 0.2C.



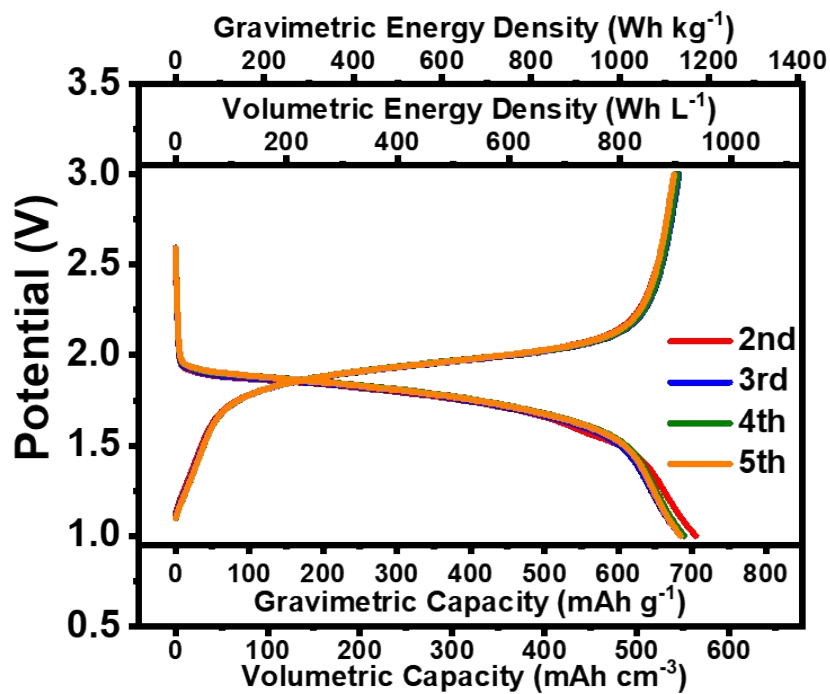

Figure S10. Galvanostatic profiles of  $\text{Se}_{\text{HL}}@ \text{HHCS}$  at 0.2C.

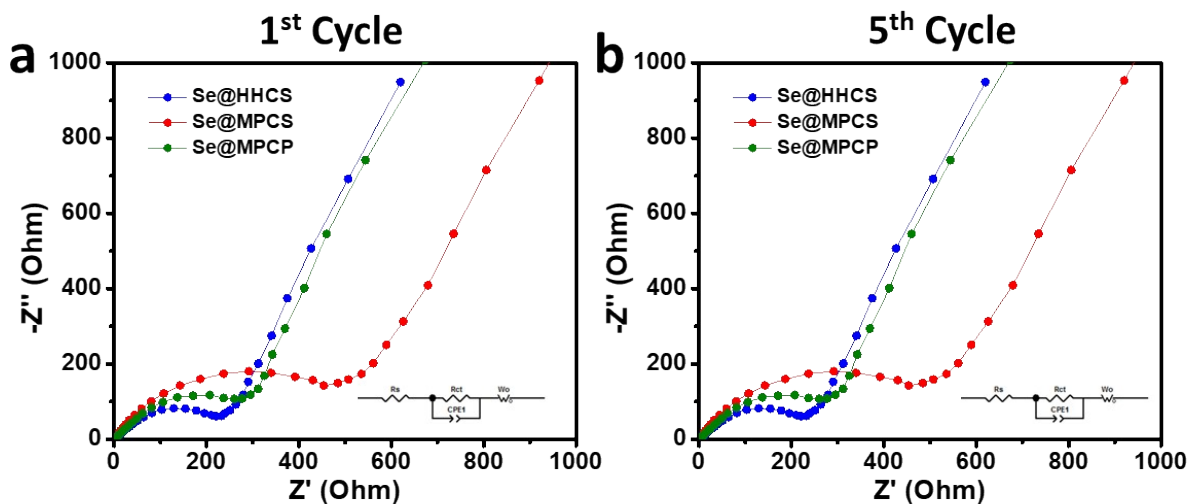

Figure S11. Nyquist plots of  $\text{Se}@ \text{MPCS}$  and  $\text{Se}@ \text{MPCP}$ : (a) after 1<sup>st</sup> cycle and (b) after 5<sup>th</sup> cycle.

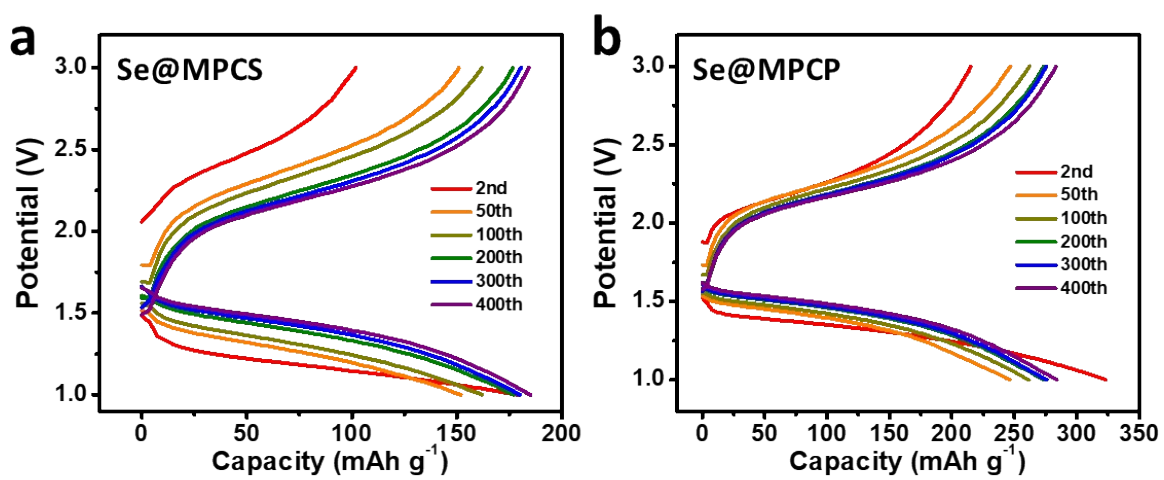

**Figure S12.** Galvanostatic profiles of (a) Se@MPCS and (b) Se@MPCP at 2C after 2<sup>nd</sup>, 50<sup>th</sup>, 100<sup>th</sup>, 200<sup>th</sup>, 300<sup>th</sup> and 400<sup>th</sup> cycles.

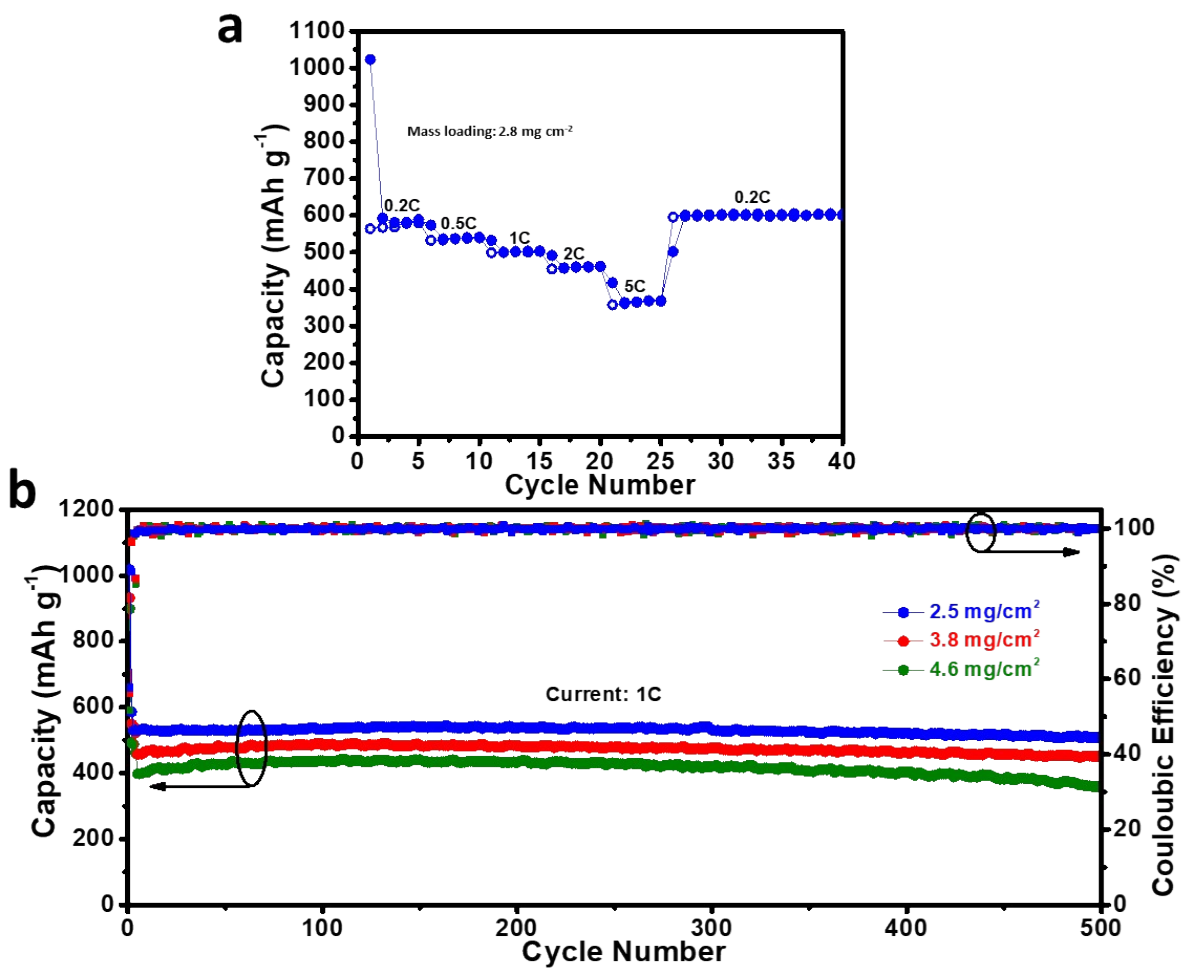

**Figure S13.** (a) Rate capability and (b) cycling performance of Se@HHCS at high electrode mass loadings.

**Table S1.** Comparison of cycling performance of Se@HHCS with Se-based cathodes from previously published reports.

| <b>Materials</b>                       | <b>Se loading<br/>(wt.%)</b> | <b>Current density<br/>(C)</b> | <b>Reversible capacity<br/>(mAh g<sup>-1</sup>) after (x) cycles</b> | <b>Reference</b> |
|----------------------------------------|------------------------------|--------------------------------|----------------------------------------------------------------------|------------------|
|                                        |                              | <b>2</b>                       | <b>558 (500<sup>th</sup>)</b>                                        |                  |
|                                        | <b>48</b>                    | <b>5</b>                       | <b>442 (1500<sup>th</sup>)</b>                                       |                  |
| <b>Se@HHCS</b>                         |                              | <b>10</b>                      | <b>357 (2000<sup>th</sup>)</b>                                       | <b>This work</b> |
|                                        |                              | <b>5</b>                       | <b>356 (600<sup>th</sup>)</b>                                        |                  |
|                                        | <b>64</b>                    | <b>10</b>                      | <b>290 (800<sup>th</sup>)</b>                                        |                  |
| Se/N-CSHPC                             | 54                           | 1                              | 425 (200 <sup>th</sup> )                                             | 1                |
| PCNS/Se                                | 58                           | 5                              | 147 (750 <sup>th</sup> )                                             | 2                |
| Se@HCS200                              | 49                           | 5                              | 105 (100 <sup>th</sup> )                                             | 3                |
| C/Se composite                         | 55                           | 2                              | 363 (500 <sup>th</sup> )                                             | 4                |
| Selenium<br>nanowires/CNT<br>composite | 60                           | 1                              | 401 (500 <sup>th</sup> )                                             | 5                |
| MPC/Se                                 | 50                           | 0.5                            | 354 (200 <sup>th</sup> )                                             | 6                |
| Se@CoSe <sub>2</sub> -PC               | 43                           | 1                              | 408 (100 <sup>th</sup> )                                             | 7                |
| PANI@Se/C-G                            | 52                           | 5                              | 403 (500 <sup>th</sup> )                                             | 8                |
| NPC/CGB-Se                             | 60                           | 1                              | 462 (1000 <sup>th</sup> )                                            | 9                |
| Se/CMK-3                               | 49                           | 0.1                            | 600 (50 <sup>th</sup> )                                              | 10               |
| Se/CNSs                                | 60                           | 0.5                            | 376 (1000 <sup>th</sup> )                                            | 11               |
| Se@MICP                                | 51                           | 1                              | 249 (3000 <sup>th</sup> )                                            | 12               |
| Se-NCSs                                | 56                           | 1                              | 301 (500 <sup>th</sup> )                                             | 13               |
| Se/CMCs                                | 50                           | 2                              | 166 (460 <sup>th</sup> )                                             | 14               |

|                         |    |     |                           |    |
|-------------------------|----|-----|---------------------------|----|
| HPTCs/Se                | 53 | 2   | 317 (900 <sup>th</sup> )  | 15 |
| Se/(CNT@MPC)            | 50 | 1   | 352 (100 <sup>th</sup> )  | 16 |
| MHPCS/Se                | 48 | 1   | 200 (100 <sup>th</sup> )  | 17 |
| MiC/Se                  | 44 | 0.5 | 400 (500 <sup>th</sup> )  | 18 |
| Se/MCNF                 | 50 | 1   | 403 (2000 <sup>th</sup> ) | 19 |
| Se/MCN-RGO              | 62 | 1   | 400 (1300 <sup>th</sup> ) | 20 |
| MWCNT/Se                | 60 | 4   | 231 (100 <sup>th</sup> )  | 21 |
| Se-BPC                  | 45 | 2   | 216 (80 <sup>th</sup> )   | 22 |
| meso-C@Se composite     | 48 | 3   | 417 (100 <sup>th</sup> )  | 23 |
| MCMs/Se                 | 50 | 0.5 | 300 (100 <sup>th</sup> )  | 24 |
| NCS/Se-50               | 50 | 5   | 287 (60 <sup>th</sup> )   | 25 |
| HCPS/Se                 | 41 | 0.5 | 299 (100 <sup>th</sup> )  | 26 |
| PCM/Se                  | 52 | 2   | 230 (510 <sup>th</sup> )  | 27 |
| PCNFW/Se                | 33 | 1   | 324 (300 <sup>th</sup> )  | 28 |
| Se-NCHPC                | 56 | 2   | 305 (60 <sup>th</sup> )   | 29 |
| Graphene-Se@CNT         | 30 | 0.1 | 315 (100 <sup>th</sup> )  | 30 |
| Se@3D MIL-68(Al)@MWCNTs | 50 | 0.2 | 453 (200 <sup>th</sup> )  | 31 |
| Se/SO-HPC               | 50 | 0.5 | 394 (400 <sup>th</sup> )  | 32 |
| 3DG-CNT@Se              | 51 | 0.2 | 504 (150 <sup>th</sup> )  | 33 |
| Se@HPCNB                | 60 | 2   | 400 (1000 <sup>th</sup> ) | 34 |
| Se-HPCF                 | 50 | 5   | 202 (2000 <sup>th</sup> ) | 35 |
| FNDPC@Se-1              | 40 | ~3  | 446 (500 <sup>th</sup> )  | 36 |

## References

1. J. P. Song, L. Wu, W. D. Dong, C. F. Li, L. H. Chen, X. Dai, C. Li, H. Chen, W. Zou, W. B. Yu, Z. Y. Hu, J. Liu, H. E. Wang, Y. Li and B. L. Su, *Nanoscale*, 2019, **11**, 6970-6981.
2. W. Jin, H. Li, J. Zou, S. Inguva, Q. Zhang, S. Zeng, G. Xu and X. Zeng, *J. Alloys Compd.*, 2020, **820**, 153084.
3. R. Pongilat and K. Nallathamby, *J. Phys. Chem. C*, 2019, **123**, 5881-5889.
4. C. Zhao, Z. Hu and J. Luo, *Colloids Surf., A*, 2019, **560**, 69-77.
5. Y. Cui, X. Zhou, W. Guo, Y. Liu, T. Li, Y. Fu and L. Zhu, *Batter. Supercaps*, 2019, **2**, 784-791.
6. M. H. A. Shiraz, H. Zhu, Y. Liu, X. Sun and J. Liu, *J. Power Sources*, 2019, **438**, 227059.
7. J. Yang, H. Gao, D. Ma, J. Zou, Z. Lin, X. Kang and S. Chen, *Electrochim. Acta*, 2018, **264**, 341-349.
8. B. Wang, J. Zhang, Z. Xia, M. Fan, C. Lv, G. Tian and X. Li, *Nano Res.*, 2018, **11**, 2460-2469.
9. S. K. Park, J. S. Park and Y. C. Kang, *ACS Appl. Mater. Interfaces*, 2018, **10**, 16531-16540.
10. C. P. Yang, S. Xin, Y. X. Yin, H. Ye, J. Zhang and Y. G. Guo, *Angew. Chem. Int. Ed.*, 2013, **52**, 8363-8367.
11. S. F. Zhang, W. P. Wang, S. Xin, H. Ye, Y. X. Yin and Y. G. Guo, *ACS Appl. Mater. Interfaces*, 2017, **9**, 8759-8765.
12. Y. Liu, L. Si, X. Zhou, X. Liu, Y. Xu, J. Bao and Z. Dai, *J. Mater. Chem. A*, 2014, **2**, 17735-17739.
13. H. Lv, R. Chen, X. Wang, Y. Hu, Y. Wang, T. Chen, L. Ma, G. Zhu, J. Liang, Z. Tie, J. Liu and Z. Jin, *ACS Appl. Mater. Interfaces*, 2017, **9**, 25232-25238.
14. T. Liu, M. Jia, Y. Zhang, J. Han, Y. Li, S. Bao, D. Liu, J. Jiang and M. Xu, *J. Power Sources*, 2017, **341**, 53-59.
15. M. Jia, S. Lu, Y. Chen, T. Liu, J. Han, B. Shen, X. Wu, S.-J. Bao, J. Jiang and M. Xu, *J. Power Sources*, 2017, **367**, 17-23.
16. S. Xin, L. Yu, Y. You, H. P. Cong, Y. X. Yin, X. L. Du, Y. G. Guo, S. H. Yu, Y. Cui and J. B. Goodenough, *Nano Lett.*, 2016, **16**, 4560-4568.

17. T. Liu, C. Dai, M. Jia, D. Liu, S. Bao, J. Jiang, M. Xu and C. M. Li, *ACS Appl. Mater. Interfaces*, 2016, **8**, 16063-16070.
18. X. Wang, Y. Tan, Z. Liu, Y. Fan, M. Li, H. A. Younus, J. Duan, H. Deng and S. Zhang, *Small*, 2020, **16**, 2000266.
19. Y. Liu, L. Si, Y. Du, X. Zhou, Z. Dai and J. Bao, *J. Phys. Chem. C*, 2015, **119**, 27316-27321.
20. K. Han, Z. Liu, J. Shen, Y. Lin, F. Dai and H. Ye, *Adv. Funct. Mater.*, 2015, **25**, 455-463.
21. X. Wang, Z. Zhang, Y. Qu, G. Wang, Y. Lai and J. Li, *J. Power Sources*, 2015, **287**, 247-252.
22. Y. Qu, Z. Zhang, Y. Lai, Y. Liu and J. Li, *Solid State Ion.*, 2015, **274**, 71-76.
23. T. Liu, Y. Zhang, J. Hou, S. Lu, J. Jiang and M. Xu, *RSC Adv.*, 2015, **5**, 84038-84043.
24. L. Liu, Y. Wei, C. Zhang, C. Zhang, X. Li, J. Wang, L. Ling, W. Qiao and D. Long, *Electrochim. Acta*, 2015, **153**, 140-148.
25. Z. Li and L. Yin, *Nanoscale*, 2015, **7**, 9597-9606.
26. J. Li, X. Zhao, Z. Zhang and Y. Lai, *J. Alloys Compd.*, 2015, **619**, 794-799.
27. M. Jia, C. Mao, Y. Niu, J. Hou, S. Liu, S. Bao, J. Jiang, M. Xu and Z. Lu, *RSC Adv.*, 2015, **5**, 96146-96150.
28. J. Zhang, Z. Zhang, Q. Li, Y. Qu and S. Jiang, *J. Electrochem. Soc.*, 2014, **161**, A2093-A2098.
29. Y. Qu, Z. Zhang, S. Jiang, X. Wang, Y. Lai, Y. Liu and J. Li, *J. Mater. Chem. A*, 2014, **2**, 12255-12261.
30. K. Han, Z. Liu, H. Ye and F. Dai, *J. Power Sources*, 2014, **263**, 85-89.
31. C. Li, Y. Wang, H. Li, J. Liu, J. Song, L. Fusaro, Z.-Y. Hu, Y. Chen, Y. Li and B.-L. Su, *J. Energy Chem.*, 2021, **59**, 396-404.
32. X. Zhao, L. Yin, Z. Yang, G. Chen, H. Yue, D. Zhang, Z. Sun and F. Li, *J. Mater. Chem. A*, 2019, **7**, 21774-21782.
33. J. He, Y. Chen, W. Lv, K. Wen, P. Li, Z. Wang, W. Zhang, W. Qin and W. He, *ACS Energy Lett.*, 2016, **1**, 16-20.
34. W. D. Dong, W. B. Yu, F. J. Xia, L. D. Chen, Y. J. Zhang, H. G. Tan, L. Wu, Z. Y. Hu, H. S. H. Mohamed, J. Liu, Z. Deng, Y. Li, L. H. Chen and B. L. Su, *J. Colloid Interface Sci.*, 2021, **582**, 60-69.

35. X. Chen, L. Xu, L. Zeng, Y. Wang, S. Zeng, H. Li, X. Li, Q. Qian, M. Wei and Q. Chen, *Dalton Trans*, 2020, **49**, 14536-14542.
36. R. Qiu, R. Fei, T. Zhang, X. Liu, J. Jin, H. Fan, R. Wang, B. He, Y. Gong and H. Wang, *Electrochim. Acta*, 2020, **356**, 136832.
